# Supplementary material
Source: publisher site journal article supplement (https://www.dovepress.com/article/207640)

## Supporting Information

### In vitro mitochondria-targeted antioxidant peptide induces apoptosis in cancer cells

Figure S1. The uptake of Mito-Q and the KRSH peptide by mitochondria was analyzed using rat liver cells.

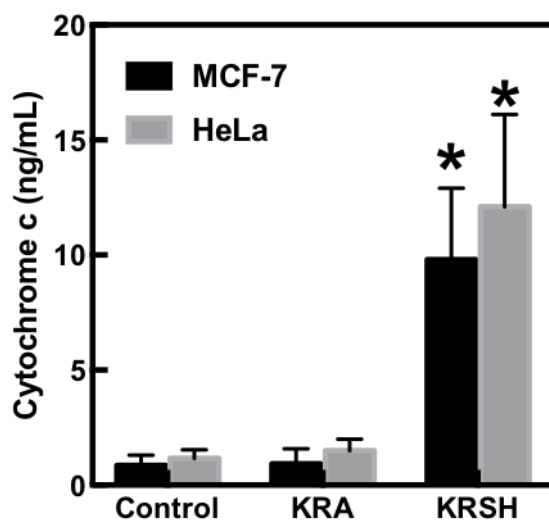

Figure S2. The release of cytochrome c in MCF-7 cells and HeLa cells after treatment with KRA and the KRSH peptide was determined using ELISA.

\* $p < 0.05$ , compared with control cells cultured in complete medium, one-way ANOVA.

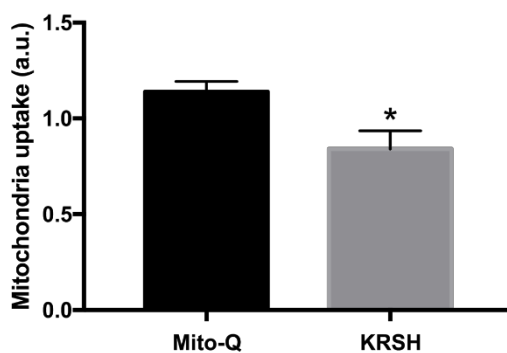

Supplement: Supplementary file 1 [file get_supplementary_file.php]
